# Supplementary material
Source: MDPI journal article supplement (https://www.mdpi.com/search?q=energies-10-00029)
Supplement: s001 [file energies-10-00029-s001.pdf]

# Supplementary Materials: Bioenergy from Low-Intensity Agricultural Systems: An Energy Efficiency Analysis

Oludunsin Arodudu, Katharina Helming, Hubert Wiggering and Alexey Voinov

**Table S1.** Conversion factors for estimating energy inputs and energy outputs of baseline options.

| <b>Energy Inputs</b>                                                                                                                                                     |                 |
|--------------------------------------------------------------------------------------------------------------------------------------------------------------------------|-----------------|
| Fossil fuel supply chain [1,2]                                                                                                                                           |                 |
| Calorific energy per litre of diesel (MJ·L <sup>-1</sup> )                                                                                                               | 32.0–35.0       |
| Calorific energy per litre of gasoline (MJ·L <sup>-1</sup> )                                                                                                             | 35.7–45.1       |
| Energy for fractional distillation of fossil fuel into diesel, gasoline etc. (MJ·L <sup>-1</sup> )                                                                       | 2.3             |
| Total energy cost of diesel used (MJ·L <sup>-1</sup> )                                                                                                                   | 34.3–37.3       |
| Total energy cost of gasoline used (MJ·L <sup>-1</sup> )                                                                                                                 | 38–47.4         |
| Direct energy for farm operations [3]                                                                                                                                    |                 |
| Energy for ploughing (MJ·ha <sup>-1</sup> ·a <sup>-1</sup> )                                                                                                             | 319.2–1550.0    |
| Energy for harrowing (MJ·ha <sup>-1</sup> ·a <sup>-1</sup> )                                                                                                             | 72.2–1464.7     |
| Energy for ridging (MJ·ha <sup>-1</sup> ·a <sup>-1</sup> )                                                                                                               | 34.2–843.7      |
| Energy for sowing (MJ·ha <sup>-1</sup> ·a <sup>-1</sup> )                                                                                                                | 34.2–1019.1     |
| Energy for fertilizer application (MJ·ha <sup>-1</sup> ·a <sup>-1</sup> )                                                                                                | 178.6–488.2     |
| Energy for pesticide spraying (MJ·ha <sup>-1</sup> ·a <sup>-1</sup> )                                                                                                    | 72.2–578.3      |
| Energy for liming (MJ·ha <sup>-1</sup> ·a <sup>-1</sup> )                                                                                                                | 178.6–488.2     |
| Energy for combined harvesting (MJ·ha <sup>-1</sup> ·a <sup>-1</sup> )                                                                                                   | 247.0–976.4     |
| Total direct energy for farm operations (MJ·ha <sup>-1</sup> ·a <sup>-1</sup> )                                                                                          | 1136.2–7408.6   |
| Indirect energy for farm operations [1,4]                                                                                                                                |                 |
| Energy for fertilizer production (N-Nitrogen) (MJ·kg <sup>-1</sup> )                                                                                                     | 43.0–65.3       |
| Energy for fertilizer production ( P-Phosphorus) (MJ·kg <sup>-1</sup> )                                                                                                  | 4.8–32.0        |
| Energy for fertilizer production ( K-Potassium) (MJ·kg <sup>-1</sup> )                                                                                                   | 5.3–13.8        |
| Energy for lime production (MJ·kg <sup>-1</sup> ·a <sup>-1</sup> )                                                                                                       | 0.6–1.8         |
| Energy for pesticide production (herbicides) (MJ·kg <sup>-1</sup> )                                                                                                      | 237.3–422.0     |
| Energy for pesticide production (insecticides + fungicides) (MJ·kg <sup>-1</sup> )                                                                                       | 237.3–422.0     |
| Quantity of lime (kg·ha <sup>-1</sup> ·a <sup>-1</sup> )                                                                                                                 | 270–699         |
| Quantity of herbicides applied (kg·ha <sup>-1</sup> )                                                                                                                    | 2.1–4.7         |
| Quantity of insecticides applied (kg·ha <sup>-1</sup> )                                                                                                                  | 0.2–1.1         |
| Quantity of fungicides applied (kg·ha <sup>-1</sup> )                                                                                                                    | 0.2–1.1         |
| Energy for lime production (270 – 699 kg·ha <sup>-1</sup> ·a <sup>-1</sup> × 0.6 – 1.8 MJ·kg <sup>-1</sup> ·a <sup>-1</sup> ) (MJ·ha <sup>-1</sup> ·a <sup>-1</sup> )    | 162.0–1258.2    |
| Energy for pesticide production (herbicides-2.1 – 4.7 kg·ha <sup>-1</sup> × 237.3 – 422.0 MJ·kg <sup>-1</sup> ) =<br>498.3 – 1983.4 MJ·ha <sup>-1</sup> ·a <sup>-1</sup> | 498.3–1983.4    |
| Energy for pesticide production (insecticides + fungicides) × 237.3 – 422.0 MJ·kg <sup>-1</sup> × 2) =<br>47.5 – 464.2 × 2 MJ·ha <sup>-1</sup> ·a <sup>-1</sup>          | 95.0–928.4      |
| Total energy for transportation of inputs and co-products (MJ·kg <sup>-1</sup> ·km <sup>-1</sup> ·a <sup>-1</sup> )                                                      | 0.0048–0.0058   |
| Energy for human labour (MJ·ha <sup>-1</sup> ·a <sup>-1</sup> ) (for eight farm operations)                                                                              | 1.5–10.3        |
| Energy for plant operations (ethanol) [5,6]                                                                                                                              |                 |
| Energy for wet milling operations (MJ·t <sup>-1</sup> )                                                                                                                  | 3795.2–4886.0   |
| Energy for human labour (MJ·a <sup>-1</sup> )                                                                                                                            | 365.0–803.0     |
| Total energy for plant operation (ethanol) (MJ·ha <sup>-1</sup> ·a <sup>-1</sup> )                                                                                       | 4174.7–61075.0  |
| Energy for plant operations (biogas) [7]                                                                                                                                 |                 |
| Energy for wet oxidation (MJ·t <sup>-1</sup> )                                                                                                                           | 5.0             |
| Energy for biogas plant operation (MJ·t <sup>-1</sup> )                                                                                                                  | 193.0           |
| Energy for human labour (MJ·a <sup>-1</sup> )                                                                                                                            | 365.0–803.0     |
| Total energy for plant operation (biogas) (MJ·ha <sup>-1</sup> ·a <sup>-1</sup> )                                                                                        | 217.8–2475.0    |
| <b>Energy outputs</b>                                                                                                                                                    |                 |
| Energy from maize grain ethanol [8–10]                                                                                                                                   |                 |
| Volume of ethanol per ton of maize (L·t <sup>-1</sup> )                                                                                                                  | 378.0–435.0     |
| Calorific energy per litre of ethanol (MJ·L <sup>-1</sup> )                                                                                                              | 21.1–23.4       |
| Total energy from maize ethanol (MJ·t <sup>-1</sup> )                                                                                                                    | 7975.8–10179.0  |
| Energy from maize grain biogas [4]                                                                                                                                       |                 |
| Volatile solids (%)                                                                                                                                                      | 93.0–95.0       |
| Volume of biogas per ton of maize (m <sup>3</sup> ·t <sup>-1</sup> )                                                                                                     | 560.0           |
| Calorific energy per m <sup>3</sup> of biogas (MJ·m <sup>-3</sup> )                                                                                                      | 21.0–25.0       |
| Total energy from maize biogas (MJ·t <sup>-1</sup> )                                                                                                                     | 10936.8–13300.0 |

**Table S2.** The individual differences in values of NEG and EROEI (for maize ethanol and maize biogas production systems), as a result of the adoption of different agronomic factor options across different agro-climatic zones.

| Agro-Climatic Zones                                        |  | Tropics                       |              |               |              | Sub-Tropics                   |              |               |              | Temperate                     |              |               |              |
|------------------------------------------------------------|--|-------------------------------|--------------|---------------|--------------|-------------------------------|--------------|---------------|--------------|-------------------------------|--------------|---------------|--------------|
| Energy efficiency indicator                                |  | NEG (in GJ·ha <sup>-1</sup> ) |              | EROEI         |              | NEG (in GJ·ha <sup>-1</sup> ) |              | EROEI         |              | NEG (in GJ·ha <sup>-1</sup> ) |              | EROEI         |              |
| Biofuel                                                    |  | Maize Ethanol                 | Maize Biogas | Maize Ethanol | Maize Biogas | Maize Ethanol                 | Maize Biogas | Maize Ethanol | Maize Biogas | Maize Ethanol                 | Maize Biogas | Maize Ethanol | Maize Biogas |
| Agronomic factor category: Farm power options              |  |                               |              |               |              |                               |              |               |              |                               |              |               |              |
| Baseline: Four wheel drive > 50 HP tractor (Initial value) |  | 2.4–42.2                      | 9.6–138.5    | 1.3–1.7       | 4.4–9.5      | 5.2–28.4                      | 16.9–123.1   | 1.3–1.8       | 4.0–11.7     | 4.6–34.6                      | 16.4–127.8   | 1.3–1.7       | 4.1–9.6      |
| Two wheel drive 20–49 HP tractor                           |  | ↓ 3.2–5.7 ↓                   | ↓ 3.2–5.7 ↓  | ↓ 0.3–0.6 ↓   | ↓ 3.0–3.7 ↓  | ↓ 3.2–5.7 ↓                   | ↓ 3.2–5.7 ↓  | ↓ 0.2–0.4 ↓   | ↓ 1.7–5.7 ↓  | ↓ 3.2–5.7 ↓                   | ↓ 3.2–5.7 ↓  | ↓ 0.3–0.4 ↓   | ↓ 1.9–4.3 ↓  |
| Single axle riding type 10–20 HP tractor                   |  | ↓ 0.4–5.0 ↑                   | ↓ 0.4–5.0 ↑  | 0.0–0.1 ↓     | ↓ 0.2–0.5 ↓  | ↓ 0.4–5.0 ↑                   | ↓ 0.4–5.0 ↑  | 0.0–0.1 ↑     | ↑ 0.6–0.7 ↓  | ↓ 0.4–5.0 ↑                   | ↓ 0.4–5.0 ↑  | 0.0–0.1 ↑     | ↓ 0.5–1.0 ↑  |
| Ordinary single axle < 9 HP tractor                        |  | ↓ 0.1–3.5 ↓                   | ↓ 0.1–3.5 ↓  | ↓ 0.2–0.5 ↓   | ↓ 2.4–2.8 ↓  | ↓ 0.1–3.5 ↓                   | ↓ 0.1–3.5 ↓  | ↓ 0.1–0.3 ↓   | ↓ 0.9–4.3 ↓  | ↓ 0.1–3.5 ↓                   | ↓ 0.1–3.5 ↓  | ↓ 0.1–0.3 ↓   | ↓ 1.2–3.2 ↓  |
| Man                                                        |  | ↑ 6.4–85.0 ↑                  | ↑ 2.5–27.8 ↑ | 0.0–0.1 ↑     | ↑ 1.7–2.1 ↑  | ↑ 9.2–96.8 ↑                  | ↑ 2.8–40.5 ↑ | 0.0–0.1 ↑     | 0.0–3.2 ↑    | ↑ 9.7–88.5 ↑                  | ↑ 3.3–33.1 ↑ | ↑ 0.1–0.2 ↑   | ↑ 1.4–1.5 ↑  |
| Ox                                                         |  | ↑ 0.3–6.0 ↑                   | ↑ 1.4–11.3 ↑ | ↑ 0.1–0.1 ↑   | ↑ 0.5–1.0 ↑  | ↑ 0.3–6.0 ↑                   | ↑ 1.6–11.2 ↑ | 0.0–0.1 ↑     | ↑ 0.6–0.7 ↑  | ↑ 0.3–6.0 ↑                   | ↑ 1.6–11.1 ↑ | 0.0–0.1 ↑     | ↑ 0.4–1.2 ↑  |
| Buffalo                                                    |  | ↑ 0.4–6.2 ↑                   | ↑ 0.4–6.2 ↑  | ↓ 0.1–0.1 ↑   | ↑ 0.7–1.3 ↑  | ↑ 0.4–6.2 ↑                   | ↑ 0.4–6.2 ↑  | 0.0–0.1 ↑     | ↑ 0.7–0.9 ↑  | ↑ 0.4–6.2 ↑                   | ↑ 0.4–6.2 ↑  | 0.0–0.1 ↑     | ↑ 0.5–1.3 ↑  |
| Horse                                                      |  | ↑ 0.6–6.8 ↑                   | ↑ 0.6–6.8 ↑  | 0.0–0.2 ↑     | ↑ 1.3–2.1 ↑  | ↑ 0.6–6.8 ↑                   | ↑ 0.6–6.8 ↑  | 0.0–0.1 ↑     | ↑ 0.9–1.4 ↑  | ↑ 0.6–6.8 ↑                   | ↑ 0.6–6.8 ↑  | 0.0–0.2 ↑     | ↑ 1.0–1.4 ↑  |
| Donkey                                                     |  | ↑ 0.5–6.4 ↑                   | ↑ 0.5–6.4 ↑  | ↓ 0.1–0.1 ↑   | ↑ 1.0–1.6 ↑  | ↑ 0.5–6.4 ↑                   | ↑ 0.5–6.4 ↑  | 0.0–0.1 ↑     | ↑ 0.8–1.0 ↑  | ↑ 0.5–6.4 ↑                   | ↑ 0.5–6.4 ↑  | 0.0–0.1 ↑     | ↑ 0.7–1.3 ↑  |
| Mule                                                       |  | ↑ 0.4–6.1 ↑                   | ↑ 0.4–6.1 ↑  | ↓ 0.1–0.1 ↑   | ↑ 0.7–1.2 ↑  | ↑ 0.4–6.1 ↑                   | ↑ 0.4–6.1 ↑  | 0.0–0.1 ↑     | ↑ 0.7–0.8 ↑  | ↑ 0.4–6.1 ↑                   | ↑ 0.4–6.1 ↑  | 0.0–0.1 ↑     | ↑ 0.5–1.2 ↑  |
| Camel                                                      |  | ↑ 0.5–6.3 ↑                   | ↑ 0.5–6.3 ↑  | ↓ 0.1–0.2 ↑   | ↑ 1.1–1.8 ↑  | ↑ 0.5–6.3 ↑                   | ↑ 0.5–6.3 ↑  | 0.0–0.1 ↑     | ↑ 0.8–1.2 ↑  | ↑ 0.5–6.3 ↑                   | ↑ 0.5–6.3 ↑  | 0.0–0.1 ↑     | ↑ 0.8–1.3 ↑  |
| Agronomic factor category: Seed sowing options             |  |                               |              |               |              |                               |              |               |              |                               |              |               |              |
| Baseline: Native seeds (Initial value)                     |  | 2.4–42.2                      | 9.6–138.5    | 1.3–1.7       | 4.4–9.5      | 5.2–28.4                      | 16.9–123.1   | 1.3–1.8       | 4.0–11.7     | 4.6–34.6                      | 16.4–127.8   | 1.3–1.7       | 4.1–9.6      |
| Hybrid seeds                                               |  | ↓ 3.8–7.1 ↓                   | ↓ 3.8–7.1 ↓  | ↓ 0.3–0.5 ↓   | ↓ 2.5–4.0 ↓  | ↓ 2.2–2.7 ↓                   | ↓ 2.2–2.7 ↓  | ↓ 0.1–0.3 ↓   | ↓ 0.7–6.2 ↓  | ↓ 2.2–3.7 ↓                   | ↓ 2.2–3.7 ↓  | ↓ 0.2–0.3 ↓   | ↓ 1.4–4.2 ↓  |
| GMO seeds                                                  |  | ↓ 0.3–2.2 ↓                   | ↓ 0.3–2.2 ↓  | ↓ 0.1–0.2 ↓   | ↓ 0.5–0.6 ↓  | ↓ 0.3–1.3 ↓                   | ↓ 0.3–2.2 ↓  | 0.0           | ↓ 0.3–0.6 ↓  | ↓ 0.3–2.2 ↓                   | ↓ 0.3–2.2 ↓  | 0.0–0.1 ↓     | ↓ 0.4–0.5 ↓  |
| Agronomic factor category: Fertilizer options              |  |                               |              |               |              |                               |              |               |              |                               |              |               |              |
| Baseline: Synthetic fertilizer (Initial value)             |  | 2.4–42.2                      | 9.6–138.5    | 1.3–1.7       | 4.4–9.5      | 5.2–28.4                      | 16.9–123.1   | 1.3–1.8       | 4.0–11.7     | 4.6–34.6                      | 16.4–127.8   | 1.3–1.7       | 4.1–9.6      |
| Animal manure                                              |  | ↑ 0.4–7.6 ↑                   | ↑ 0.3–5.7 ↑  | 0.0–0.1 ↑     | ↑ 0.8–1.8 ↑  | ↑ 0.5–20.4 ↑                  | ↑ 0.3–18.5 ↑ | ↑ 0.1–0.2 ↑   | ↑ 1.4–1.7 ↑  | ↑ 1.0–13.2 ↑                  | ↑ 0.8–11.3 ↑ | ↑ 0.1–0.2 ↑   | ↑ 1.3–3.3 ↑  |
| Biogas digestate                                           |  | ↑ 0.4–8.8 ↑                   | ↑ 0.4–6.9 ↑  | 0.0–0.1 ↑     | ↑ 0.9–2.2 ↑  | ↑ 0.5–21.6 ↑                  | ↑ 0.3–19.7 ↑ | ↑ 0.1–0.2 ↑   | ↑ 1.7–1.9 ↑  | ↑ 1.0–14.4 ↑                  | ↑ 0.9–12.6 ↑ | ↑ 0.1–0.3 ↑   | ↑ 1.4–3.7 ↑  |

Table S2. Cont.

| Agro-Climatic Zones                                             | Tropics                       |              |               |              | Sub-Tropics                   |               |               |              | Temperate                     |               |               |              |
|-----------------------------------------------------------------|-------------------------------|--------------|---------------|--------------|-------------------------------|---------------|---------------|--------------|-------------------------------|---------------|---------------|--------------|
| Energy efficiency indicator                                     | NEG (in GJ·ha <sup>-1</sup> ) |              | EROEI         |              | NEG (in GJ·ha <sup>-1</sup> ) |               | EROEI         |              | NEG (in GJ·ha <sup>-1</sup> ) |               | EROEI         |              |
| Biofuel                                                         | Maize Ethanol                 | Maize Biogas | Maize Ethanol | Maize Biogas | Maize Ethanol                 | Maize Biogas  | Maize Ethanol | Maize Biogas | Maize Ethanol                 | Maize Biogas  | Maize Ethanol | Maize Biogas |
| Agronomic factor category: Tillage options                      |                               |              |               |              |                               |               |               |              |                               |               |               |              |
| Baseline: Mouldboard with pesticide application (initial value) | 2.4–42.2                      | 9.6–138.5    | 1.3–1.7       | 4.4–9.5      | 5.2–28.4                      | 16.9–123.1    | 1.3–1.8       | 4.0–11.7     | 4.6–34.6                      | 16.4–127.8    | 1.3–1.7       | 4.1–9.6      |
| Mouldboard without pesticide application                        | ↑ 0.2–0.5 ↑                   | ↑ 0.2–0.5 ↑  | 0.0–0.1 ↓     | ↑ 0.1–0.3 ↑  | ↑ 0.2–0.5 ↑                   | ↑ 0.2–0.5 ↑   | 0.0           | ↑ 0.1–0.4 ↑  | ↑ 0.2–0.5 ↑                   | ↑ 0.2–0.5 ↑   | 0.0           | ↑ 0.1–0.3 ↑  |
| Chisel                                                          | ↑ 0.2–1.2 ↑                   | ↑ 0.2–1.2 ↑  | 0.0–0.1 ↓     | ↑ 0.4–0.5 ↑  | ↑ 0.2–1.2 ↑                   | ↑ 0.2–1.2 ↑   | 0.0           | ↑ 0.2–0.5 ↑  | ↑ 0.2–1.2 ↑                   | ↑ 0.2–1.2 ↑   | 0.0           | ↑ 0.3–0.4 ↑  |
| Disk                                                            | ↑ 0.4–2.4 ↑                   | ↑ 0.4–2.4 ↑  | ↓ 0.1–0.1 ↑   | ↑ 0.7–0.8 ↑  | ↑ 0.4–2.4 ↑                   | ↑ 0.4–2.4 ↑   | 0.0           | ↑ 0.3–0.7 ↑  | ↑ 0.4–2.4 ↑                   | ↑ 0.4–2.4 ↑   | 0.0–0.1 ↑     | ↑ 0.4–0.6 ↑  |
| Ridge plant                                                     | ↑ 0.4–2.7 ↑                   | ↑ 0.4–2.7 ↑  | ↓ 0.1–0.1 ↑   | ↑ 0.7–0.9 ↑  | ↑ 0.4–2.7 ↑                   | ↑ 0.4–2.7 ↑   | 0.0           | ↑ 0.3–0.7 ↑  | ↑ 0.4–2.7 ↑                   | ↑ 0.4–2.7 ↑   | 0.0–0.1 ↑     | ↑ 0.4–0.6 ↑  |
| Stubble and mulch                                               | ↓ 0.1–2.8 ↑                   | ↓ 0.1–2.8 ↑  | 0.0–0.1 ↓     | ↓ 0.2–0.2 ↑  | 0.0–2.6 ↑                     | 0.0–2.6 ↑     | 0.0           | 0.0–0.3 ↑    | ↑ 0.1–2.5 ↑                   | ↑ 0.1–2.5 ↑   | 0.0–0.1 ↑     | ↑ 0.1–0.5 ↑  |
| Strip till                                                      | ↑ 0.3–3.8 ↑                   | ↑ 0.3–3.8 ↑  | ↓ 0.1–0.1 ↑   | ↑ 0.6–1.1 ↑  | ↑ 0.3–3.8 ↑                   | ↑ 0.3–3.8 ↑   | 0.0–0.1 ↑     | ↑ 0.5–0.6 ↑  | ↑ 0.3–3.8 ↑                   | ↑ 0.3–3.8 ↑   | 0.0–0.1 ↑     | ↑ 0.4–0.7 ↑  |
| No till                                                         | ↑ 0.2–3.4 ↑                   | ↑ 0.2–3.4 ↑  | ↓ 0.1–0.1 ↑   | ↑ 0.5–1.0 ↑  | ↑ 0.2–3.4 ↑                   | ↑ 0.2–3.4 ↑   | 0.0–0.1 ↑     | ↑ 0.4–0.5 ↑  | ↑ 0.2–3.4 ↑                   | ↑ 0.2–3.4 ↑   | 0.0–0.1 ↑     | ↑ 0.4–0.7 ↑  |
| Agronomic factor category: Irrigation options                   |                               |              |               |              |                               |               |               |              |                               |               |               |              |
| Baseline: Rain-fed (Initial value)                              | 2.4–42.2                      | 9.6–138.5    | 1.3–1.7       | 4.4–9.5      | 5.2–28.4                      | 16.9–123.1    | 1.3–1.8       | 4.0–11.7     | 4.6–34.6                      | 16.4–127.8    | 1.3–1.7       | 4.1–9.6      |
| Surface                                                         | ↓ 0.2–9.6 ↑                   | ↓ 0.2–33.4 ↑ | ↓ 0.1–0.2 ↓   | ↓ 1.3–1.6 ↑  | ↓ 0.2–18.3 ↑                  | ↓ 0.2–55.3 ↑  | ↓ 0.1–0.1 ↑   | ↓ 0.8–2.1 ↑  | ↓ 0.2–12.1 ↑                  | ↓ 0.2–39.9 ↑  | ↑ 0.1–0.2 ↓   | ↓ 1.1–1.7 ↑  |
| Sprinkler                                                       | ↓ 3.9–5.7 ↑                   | ↓ 3.9–29.5 ↑ | ↓ 0.2–0.5 ↓   | ↓ 2.6–2.7 ↓  | ↓ 3.9–14.4 ↑                  | ↓ 3.9–51.4 ↑  | ↓ 0.1–0.2 ↓   | ↓ 1.2–2.8 ↓  | ↓ 3.9–8.2 ↑                   | ↓ 3.9–36.0 ↑  | ↓ 0.1–0.3 ↓   | ↓ 1.5–1.9 ↓  |
| Drip                                                            | ↓ 3.1–7.8 ↑                   | ↓ 3.1–31.7 ↑ | ↓ 0.2–0.4 ↓   | ↓ 2.3–2.4 ↓  | ↓ 3.1–16.6 ↑                  | ↓ 3.1–53.5 ↑  | ↓ 0.1–0.2 ↓   | ↓ 1.1–1.9 ↓  | ↓ 3.1–10.4 ↑                  | ↓ 3.1–38.1 ↑  | ↓ 0.1–0.2 ↓   | ↓ 1.2–1.4 ↓  |
| Agronomic factor category: Co-product reintegration             |                               |              |               |              |                               |               |               |              |                               |               |               |              |
| Non-reintegration of co-products                                | 2.4–42.2                      | 9.6–138.5    | 1.3–1.7       | 4.4–9.5      | 5.2–28.4                      | 16.9–123.1    | 1.3–1.8       | 4.0–11.7     | 4.6–34.6                      | 16.4–127.8    | 1.3–1.7       | 4.1–9.6      |
| Reintegration of co-products                                    | ↑ 9.6–305.3 ↑                 | ↑ 0.2–26.1 ↑ | ↑ 1.6–3.4 ↑   | ↑ 0.2–0.5 ↑  | ↑ 15.8–300.4 ↑                | ↑ 0.3–25.6 ↑  | ↑ 2.0–2.8 ↑   | ↑ 0.2–0.6 ↑  | ↑ 15.8–305.6 ↑                | ↑ 0.3–25.3 ↑  | ↑ 1.8–3.0 ↑   | ↑ 0.1–0.6 ↑  |
| Agronomic factor category: Maximum transport distances          |                               |              |               |              |                               |               |               |              |                               |               |               |              |
| 10–20 km                                                        | 2.4–42.2                      | 9.6–138.5    | 1.3–1.7       | 4.4–9.5      | 5.2–28.4                      | 16.9–123.1    | 1.3–1.8       | 4.0–11.7     | 4.6–34.6                      | 16.4–127.8    | 1.3–1.7       | 4.1–9.6      |
| 21–800 km                                                       | ↓ 24.2–27.4 ↓                 | ↓ 3.8–83.7 ↓ | 0.0–0.5 ↓     | ↓ 0.8–3.4 ↓  | ↓ 6.8–41.5 ↓                  | ↓ 11.7–60.8 ↓ | 0.0–0.5 ↓     | ↓ 1.2–3.0 ↓  | ↓ 15.0–32.6 ↓                 | ↓ 12.0–68.7 ↓ | 0.0–0.5 ↓     | ↓ 0.8–3.0 ↓  |

↓ before or after values in a range indicates decrease in NEG or EROEI OR negative effects on NEG or EROEI OR negative difference in NEG or EROEI as a result of the adoption of a particular agronomic factor; ↑ before or after values in a range indicates increase in NEG or EROEI OR positive effects on NEG or EROEI OR positive difference in NEG and EROEI as a result of the adoption of a particular agronomic factor; 0.0 values in a range indicates no effects on NEG or EROEI OR no difference in NEG OR EROEI as a result of the adoption of a particular agronomic factor; ↓ before values in a range indicates decrease in NEG or EROEI at lower limit of the range; ↓ after values in a range indicates decrease in NEG or EROEI at upper limit of the range as a result of the adoption of a particular agronomic factor; ↑ before values in a range indicates increase in NEG or EROEI at lower limit; ↑ after values in a range indicates increase in NEG or EROEI at upper limit of the range as a result of the adoption of a particular agronomic factor.

## References

1. Patzek, T. Thermodynamics of the corn-ethanol biofuel cycle. *Crit. Rev. Plant Sci.* **2004**, *23*, 519–567.
2. Oak Ridge National Laboratory. Conversion factors for Bioenergy. Oak Ridge National Laboratory, U.S Department of Energy. Available online: <https://content.ces.ncsu.edu/conversion-factors-for-bioenergy> (accessed on 22 December 2016).
3. Grisso, R.; Perumpral, J.V.; Vaughan, D.; Roberson, G.T.; Pitman, R. *Predicting Tractor Diesel Fuel Consumption*; Virginia Cooperative Extension, Virginia Tech, Virginia State University: Petersburg, FL, USA, 2010; p. 10.
4. Arodudu, O.T.; Voinov, A.; van Duren, I. Assessing bioenergy potentials in rural areas. *Biomass Bioenergy* **2013**, *58*, 350–364.
5. Graboski, M.S. *Fossil Energy Use in the Manufacture of Corn Ethanol. A Report for the National Corn Growers Association*; Colorado School of Mines: Golden, CO, USA, 2002; p. 113.
6. Galitsky, C.; Worrel, E.; Ruth, M. *Energy Efficiency Improvement and Cost Saving Opportunities for the Corn Wet Milling Industry. An Energy Star® Guide for Energy and Plant Managers*; Ernest Orlando Lawrence Berkeley National Laboratory, University of California: Berkeley, CA, USA, 2003; p. 84.
7. Uellendahl, H.; Wang, G.; Møller, H.B.; Jørgensen, U.; Skiadas, I.V.; Gavala, H.N.; Ahring, B.K. Energy balance and cost-benefit analysis of biogas production from perennial energy crops pretreated by wet oxidation. *Water Sci. Technol.* **2008**, *58*, 1841–1847.
8. White, P.J.; Johnson, L.A. *Corn Chemistry and Technology*; American Association of Cereal Chemists: St. Paul, MN, USA, 2003; p. 892.
9. Bonnardeaux, J. Potential Uses for Distillers Grains. Department of Agriculture and Food, Government of Western Australia: Western Australia, Australia. Available online: <https://www.agric.wa.gov.au/> (accessed on 19 October 2014).
10. Naylor, R.L.; Liska, A.J.; Burke, M.B.; Falcon, W.P.; Gaskell, J.C.; Rozelle, S.D.; Cassman, K.G. The Ripple Effect: Biofuels, Food Security, and the Environment. *Environment* **2007**, *49*, 30–43.
